# Supplementary material
Source: PubMed Central journal article supplement (PMC2409252)

A

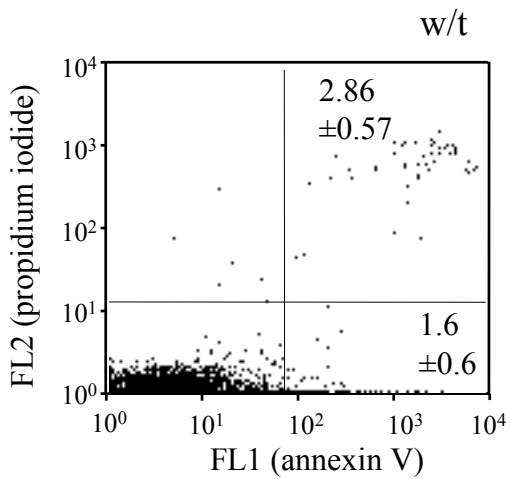

B

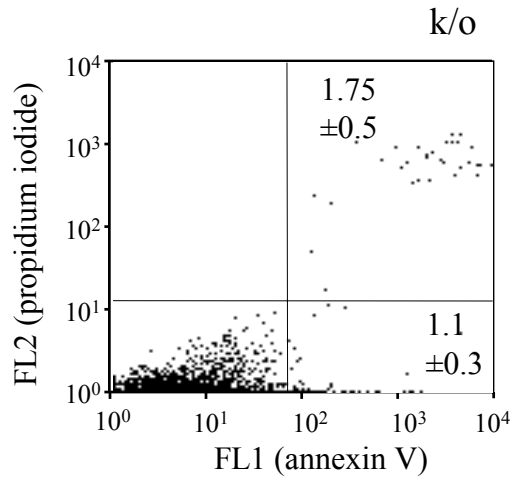

C

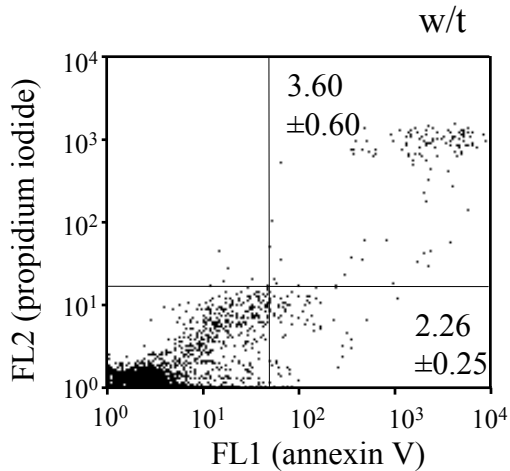

D

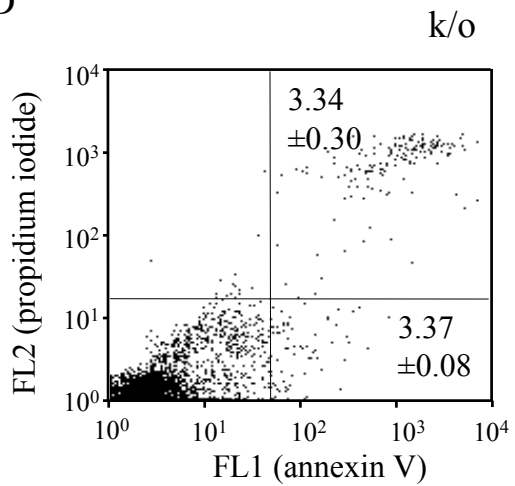

E

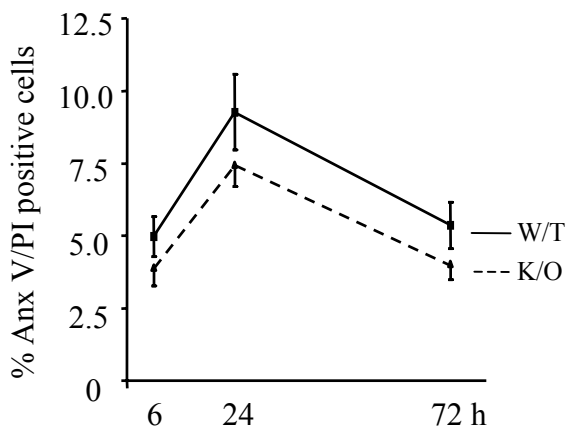

F

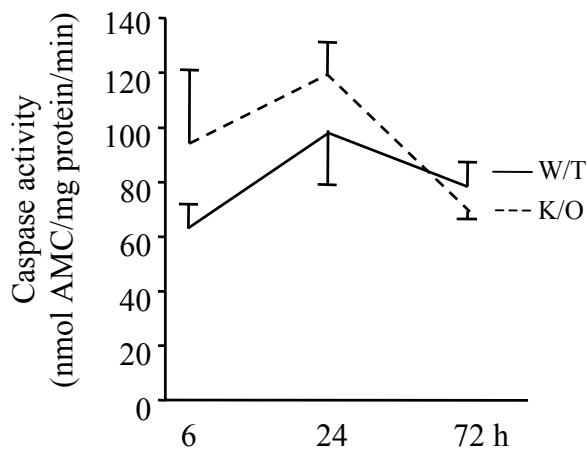

Supplement: pnas_0707394104_1.pdf [file pnas_0707394104_1.pdf]

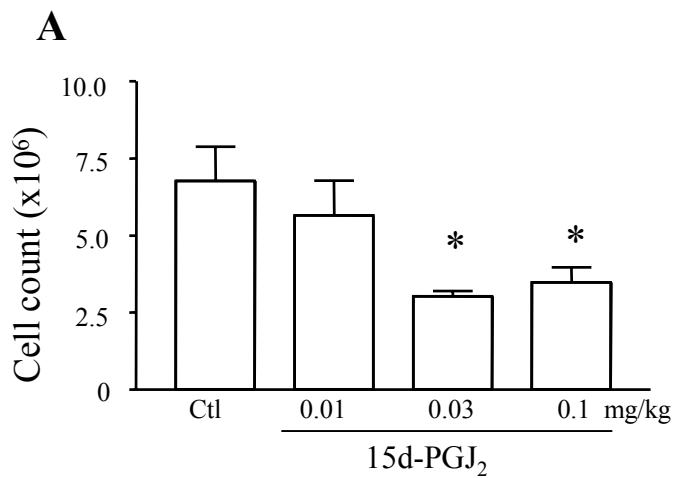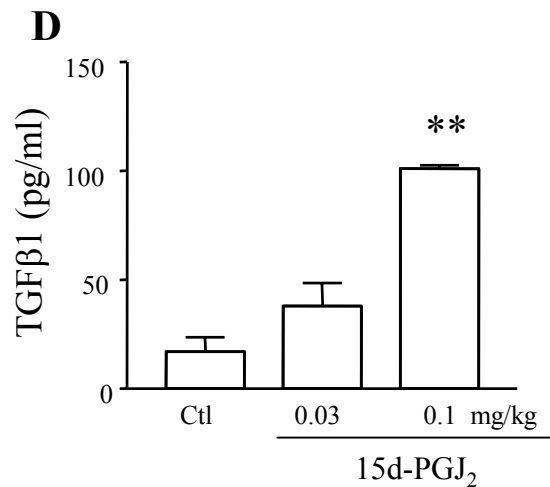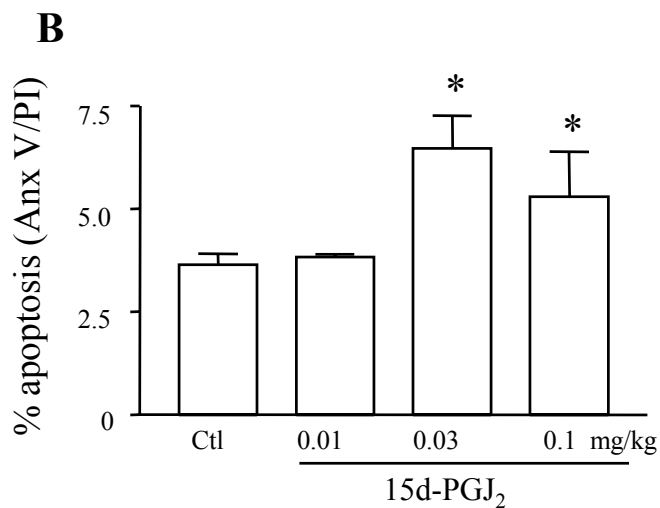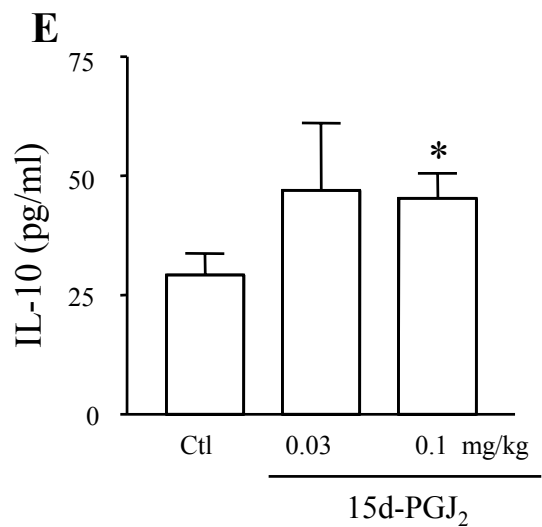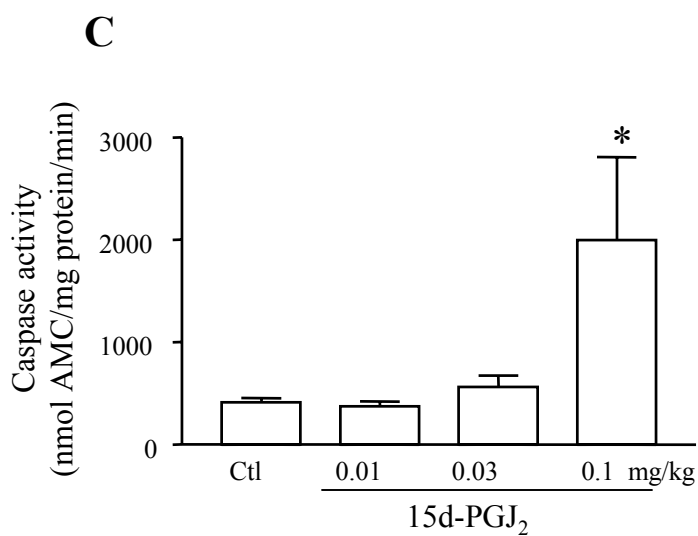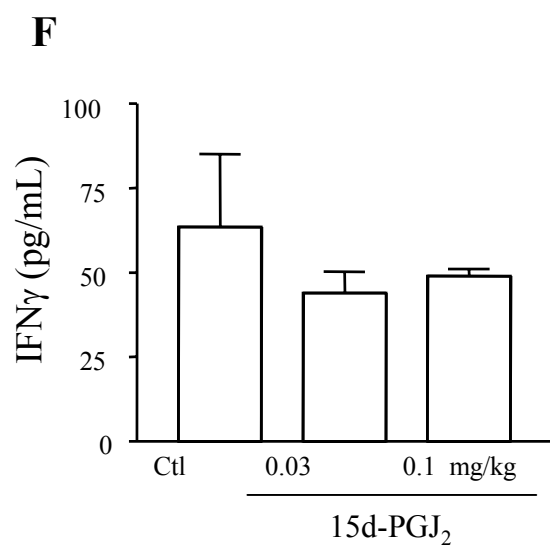

Supplement: pnas_0707394104_2.pdf [file pnas_0707394104_2.pdf]

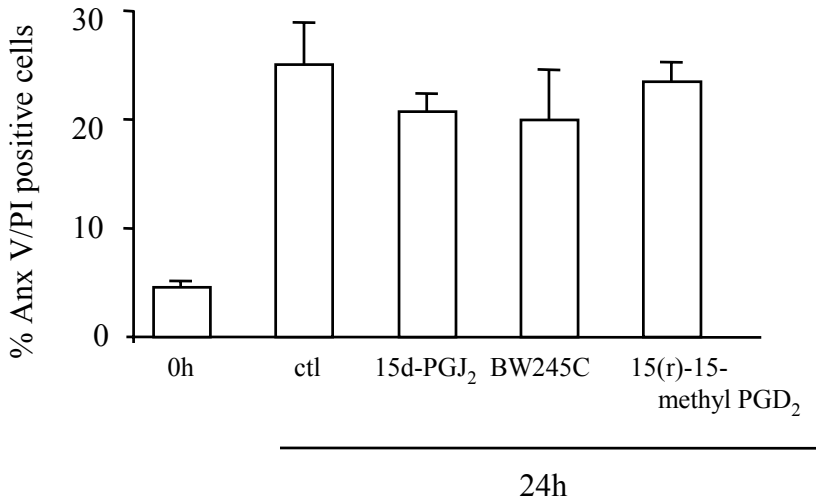

Supplement: pnas_0707394104_3.pdf [file pnas_0707394104_3.pdf]

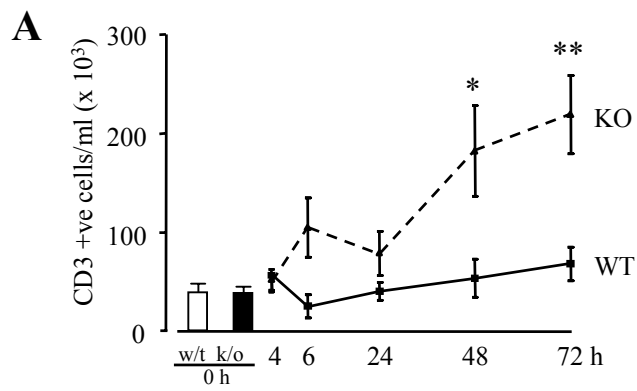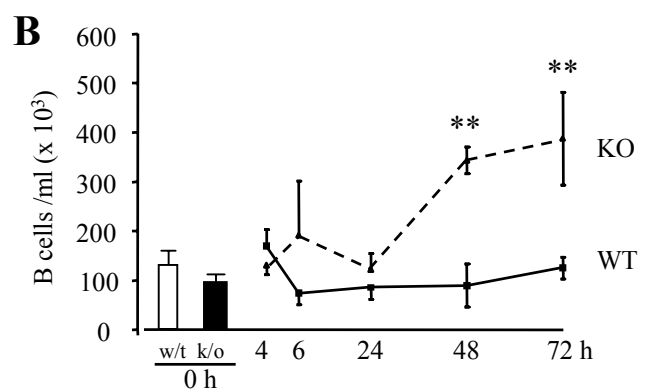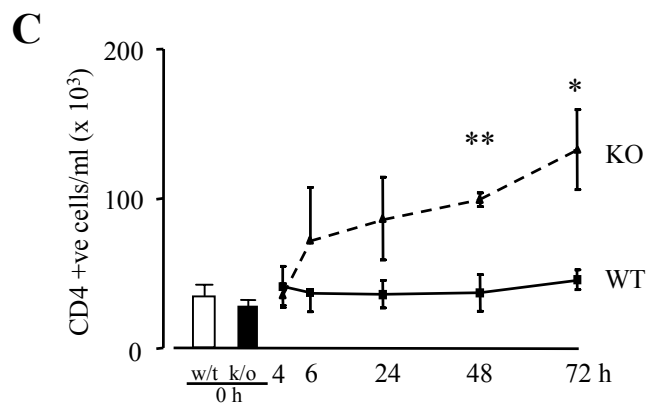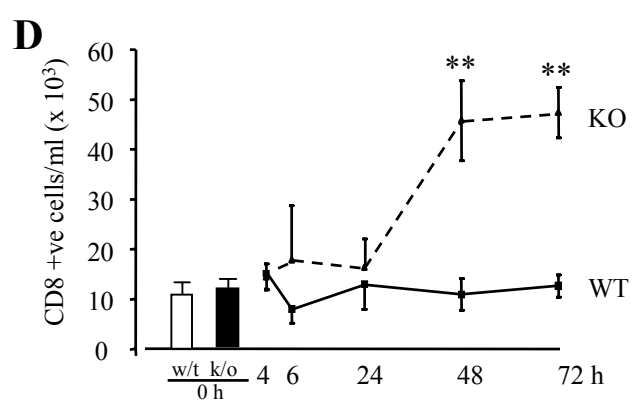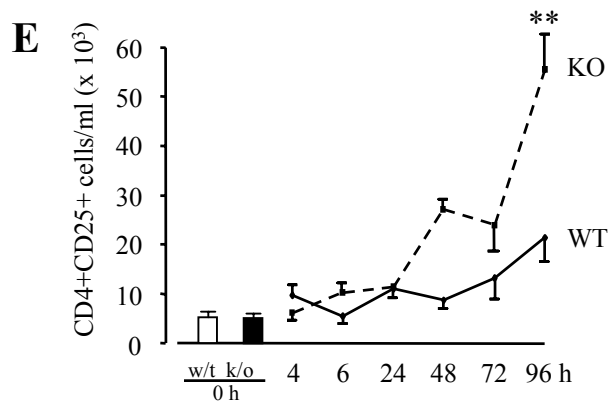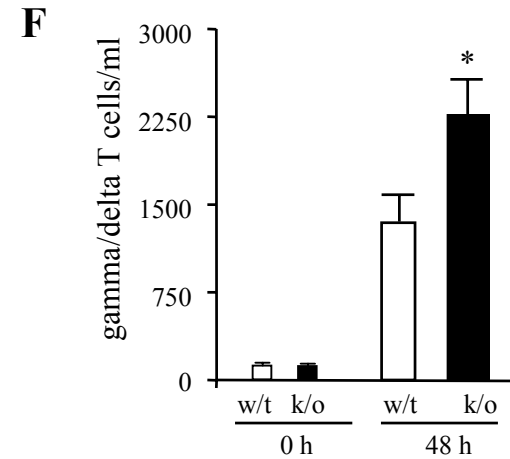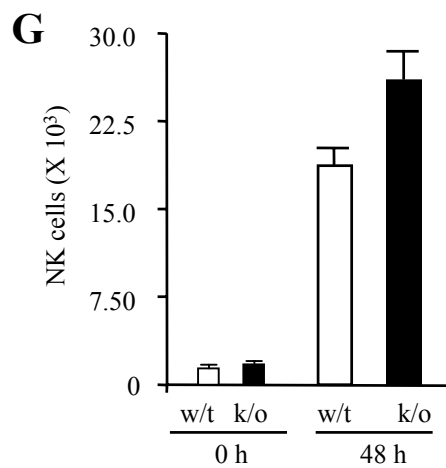

Supplement: pnas_0707394104_4.pdf [file pnas_0707394104_4.pdf]

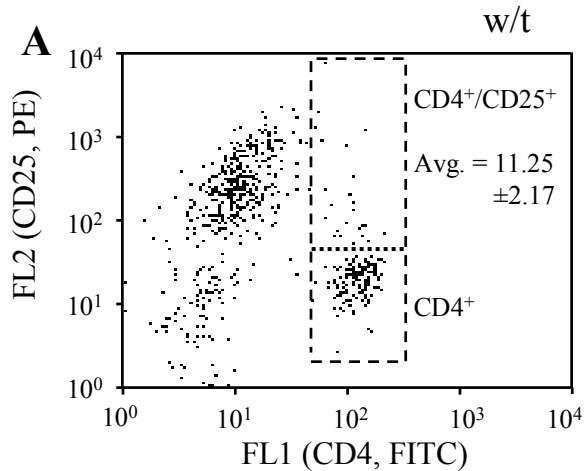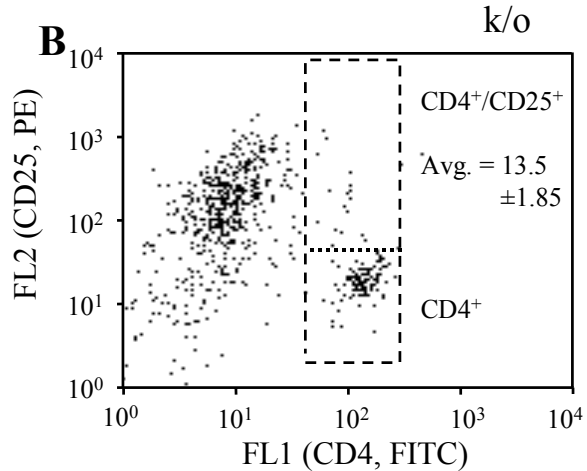

Supplement: pnas_0707394104_5.pdf [file pnas_0707394104_5.pdf]

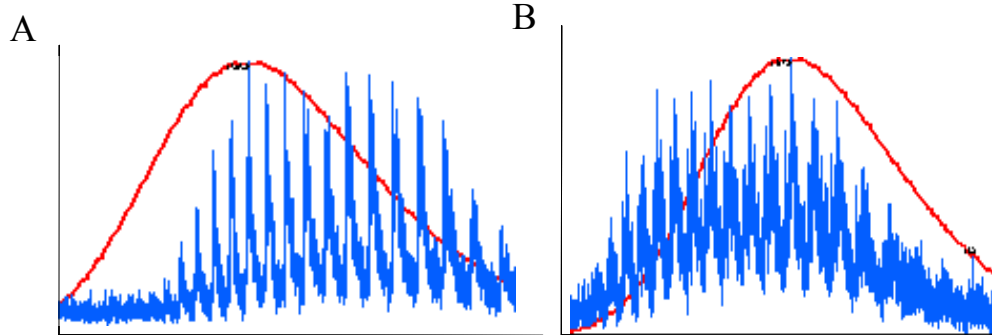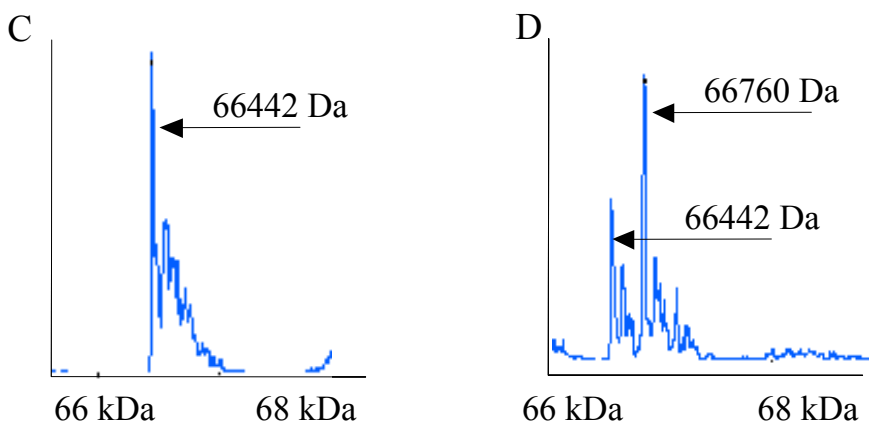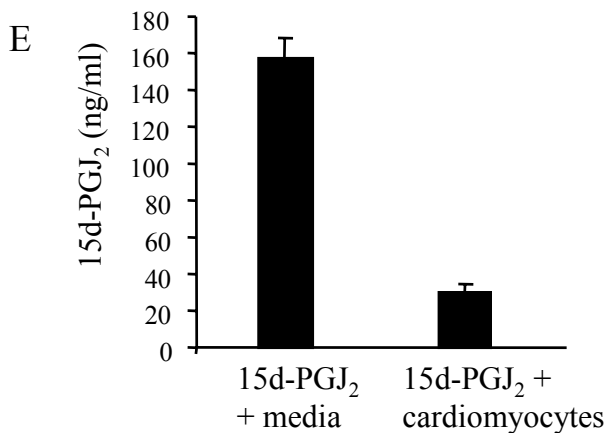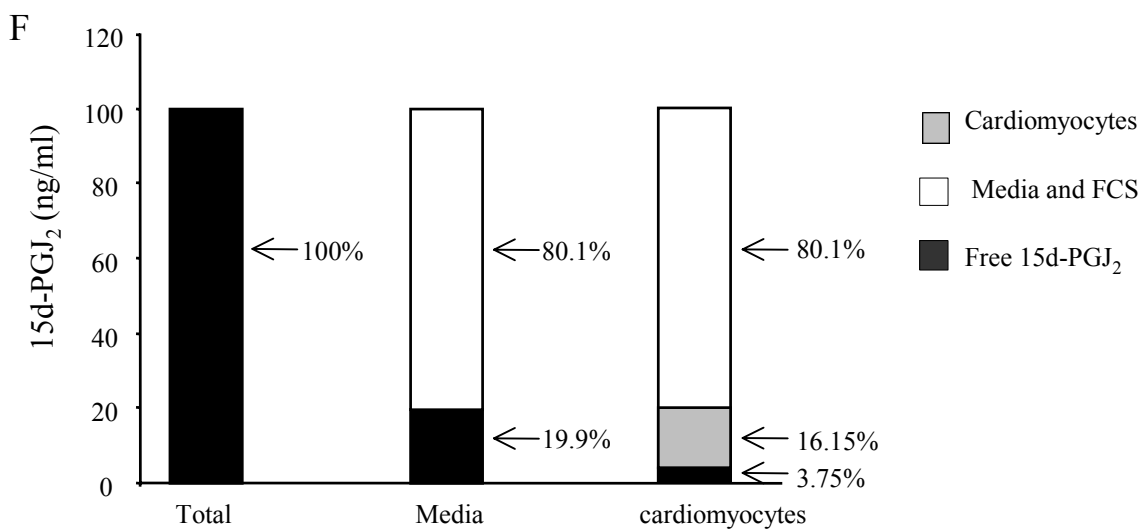

Supplement: pnas_0707394104_6.pdf [file pnas_0707394104_6.pdf]
